# Supplementary material
Source: ML conference proceedings conference paper supplement (https://openaccess.thecvf.com/content/CVPR2025/html/Xie_Training_Data_Provenance_CVPR_2025_paper.html)
Supplement: Supplementary file 1 [file Xie_Training_Data_Provenance_CVPR_2025_supplemental.zip]

# Training Data Provenance Verification: Did Your Model Use Synthetic Data from My Generative Model for Training?

## Supplementary Material

### A. Proofs

**Theorem 1.** Assume  $M$  is trained on synthetic data generated by a text-to-image model  $G$ , and a set of text prompts  $\mathcal{T}_1$ , i.e.,  $P_1(\mathbf{x}) = P(\mathbf{x}|G, \mathcal{T}_1)$ .  $\hat{M}$  can be trained on either real data or synthetic data generated by any text-to-image model. Based on the generalization errors of  $M$  and  $\hat{M}$  on the target domain  $T = \{\mathcal{X}, P(\mathbf{x}|G, \mathcal{T}_t)\}$ , we have:

$$\sup_{P_2(\mathbf{x})=P(\mathbf{x}|G, \mathcal{T}_2)} |\Delta\epsilon_T| \leq \sup_{P_2(\mathbf{x}) \perp G} |\Delta\epsilon_T|, \quad (3)$$

where  $\Delta\epsilon_T$  represents the difference in generalization error between  $M$  and  $\hat{M}$  on the target domain  $T$ , expressed as  $\Delta\epsilon_T = \epsilon_T(M) - \epsilon_T(\hat{M})$ .  $P_2(\mathbf{x}) \perp G$  denotes that  $P_2(\mathbf{x})$  is independent of  $G$ , meaning  $P_2(\mathbf{x}) = P(\mathbf{x}|G', \mathcal{T}_2)$  or  $P_2(\mathbf{x}) = P_R(\mathbf{x})$ , where  $G'$  is a text-to-image model different from  $G$  and  $P_R(\mathbf{x})$  represents the distribution of real data.  $\mathcal{T}_1$ ,  $\mathcal{T}_2$  and  $\mathcal{T}_t$  are distinct sets of text prompts.

*Proof.* Theorem 1 in [2] states the upper bound of the generalization error of model  $M'$  on the target domain  $T$ . Let  $\mathcal{H}$  be a hypothesis space with VC dimension  $d'$ , and let  $m'$  be the sample size of the dataset in the source domain  $S$ . Then, with probability at least  $1 - \delta$ , for every  $M' \in \mathcal{H}$ :

$$\epsilon_T(M') \leq \hat{\epsilon}_S(M') + \sqrt{\frac{4}{m'} \left( d' \log \frac{2em'}{d'} \right)} + d_{\mathcal{H}}(P_S, P_T) + \lambda, \quad (4)$$

where  $\epsilon_T(M')$  and  $\hat{\epsilon}_S(M')$  represent the generalization error of  $M'$  on the target domain and the empirical error of  $M'$  on the source domain, respectively.  $P_S$  and  $P_T$  denote the marginal probability distributions of the source and target domains, respectively.  $d_{\mathcal{H}}(P_S, P_T)$  is the  $\mathcal{H}$ -divergence between the source and target domains, which measures the similarity between the two distributions (source and target) within the hypothesis space  $\mathcal{H}$ . A smaller  $d_{\mathcal{H}}(P_S(\mathbf{x}), P_T(\mathbf{x}))$  indicates that the distributions of the source and target domains are closer.  $\lambda$  is a constant and  $e$  is the base of the natural logarithm.

Substitute  $P_T = P(\mathbf{x}|G, \mathcal{T}_t)$  into Eq. (4), for  $M$  with the source domain distribution  $P(\mathbf{x}|G, \mathcal{T}_1)$ :

$$\epsilon_T(M) \leq \hat{\epsilon}_S(M) + \sqrt{\frac{4}{m} \left( d \log \frac{2em}{d} \right)} + d_{\mathcal{H}}(P(\mathbf{x}|G, \mathcal{T}_1), P(\mathbf{x}|G, \mathcal{T}_t)) + \lambda \quad (5)$$

For  $\hat{M}$  with the source domain distribution  $P(\mathbf{x}|G, \mathcal{T}_2)$ ,

similarly:

$$\epsilon_T(\hat{M}_1) \leq \hat{\epsilon}_S(\hat{M}_1) + \sqrt{\frac{4}{\hat{m}_1} \left( \hat{d} \log \frac{2e\hat{m}_1}{\hat{d}} \right)} + d_{\mathcal{H}}(P(\mathbf{x}|G, \mathcal{T}_2), P(\mathbf{x}|G, \mathcal{T}_t)) + \lambda \quad (6)$$

To distinguish from later cases, we denote  $\hat{M}$  trained in this situation as  $\hat{M}_1$  and  $m$  as  $\hat{m}_1$ . For  $\hat{M}$  with the source domain distribution  $P(\mathbf{x}|G', \mathcal{T}_2)$ , similarly:

$$\epsilon_T(\hat{M}_2) \leq \hat{\epsilon}_S(\hat{M}_2) + \sqrt{\frac{4}{\hat{m}_2} \left( \hat{d} \log \frac{2e\hat{m}_2}{\hat{d}} \right)} + d_{\mathcal{H}}(P(\mathbf{x}|G', \mathcal{T}_2), P(\mathbf{x}|G, \mathcal{T}_t)) + \lambda \quad (7)$$

We denote  $\hat{M}$  trained in this situation as  $\hat{M}_2$  and  $m$  as  $\hat{m}_2$ .

We denote the upper bounds in Eq. (5), Eq. (6), and Eq. (7) as  $\xi$ ,  $\hat{\xi}_1$ , and  $\hat{\xi}_2$ , respectively. Then we calculate the upper bound of  $|\epsilon_T(M) - \epsilon_T(\hat{M}_1)|$ :

$$\sup |\epsilon_T(M) - \epsilon_T(\hat{M}_1)| = \max\{\xi, \hat{\xi}_1\} \quad (8)$$

For the upper bound of  $|\epsilon_T(M) - \epsilon_T(\hat{M}_2)|$ :

$$\sup |\epsilon_T(M) - \epsilon_T(\hat{M}_2)| = \max\{\xi, \hat{\xi}_2\} \quad (9)$$

Assuming that  $\hat{M}$  is trained on the same amount of source domain data in both cases, i.e.,  $\hat{m}_1 = \hat{m}_2$ . Additionally, assuming the empirical errors on the training set are also the same, i.e.,  $\hat{\epsilon}_S(\hat{M}_1) = \hat{\epsilon}_S(\hat{M}_2)$ . Therefore, the only difference between  $\hat{\xi}_1$  and  $\hat{\xi}_2$  lies in the  $d_{\mathcal{H}}(\cdot, \cdot)$  term. Since the generative model in the conditions for  $P(\mathbf{x}|G, \mathcal{T}_2)$  and  $P(\mathbf{x}|G, \mathcal{T}_t)$  is the same while the text conditions differ, whereas both differ in the conditions for  $P(\mathbf{x}|G', \mathcal{T}_2)$  and  $P(\mathbf{x}|G, \mathcal{T}_t)$ , it follows that:

$$d_{\mathcal{H}}(P(\mathbf{x}|G, \mathcal{T}_2), P(\mathbf{x}|G, \mathcal{T}_t)) \leq d_{\mathcal{H}}(P(\mathbf{x}|G', \mathcal{T}_2), P(\mathbf{x}|G, \mathcal{T}_t)) \quad (10)$$

Therefore,  $\hat{\xi}_1 \leq \hat{\xi}_2$ , i.e.,

$$\sup |\epsilon_T(M) - \epsilon_T(\hat{M}_1)| \leq \sup |\epsilon_T(M) - \epsilon_T(\hat{M}_2)| \quad (11)$$

Alternatively, it can be expressed as:

$$\sup_{P_2(\mathbf{x})=P(\mathbf{x}|G, \mathcal{T}_2)} |\Delta\epsilon_T| \leq \sup_{P_2(\mathbf{x})=P(\mathbf{x}|G', \mathcal{T}_2)} |\Delta\epsilon_T|, \quad (12)$$

where  $\Delta\epsilon_T = \epsilon_T(M) - \epsilon_T(\hat{M})$ .

Similarly, when  $\hat{M}$  is trained on real data  $\mathbf{x} \sim P_R(\mathbf{x})$ , we have:

$$\sup_{P_2(\mathbf{x})=P(\mathbf{x}|G, T_2)} |\Delta\epsilon_T| \leq \sup_{P_2(\mathbf{x})=P_R(\mathbf{x})} |\Delta\epsilon_T| \quad (13)$$

By combining Eq. (12) and Eq. (13), we obtain:

$$\sup_{P_2(\mathbf{x})=P(\mathbf{x}|G, T_2)} |\Delta\epsilon_T| \leq \sup_{P_2(\mathbf{x}) \perp G} |\Delta\epsilon_T|, \quad (14)$$

□

## B. The Details of Experiments

### B.1. Datasets Used

**CIFAR10** [20]: The CIFAR10 dataset consists of 32x32 colored images with 10 classes. There are 50000 training images and 10000 test images.

**CIFAR100** [20]: The CIFAR100 dataset consists of 32x32 coloured images with 100 classes. There are 50000 training images and 10000 test images.

**ImageNet-100** [40]: A randomly chosen subset of ImageNet-1K [5], which has larger sized coloured images with 100 classes. There are approximately 126,689 training images and 5000 test images. As is commonly done, we resize all images to be of size 224x224. The specific categories we use are listed in ImageNet-100.txt in the supplementary material.

### B.2. Pre-trained Text-to-image Models Used

We use four pre-trained text-to-image models, as follows:

**Stable Diffusion v1.4** [38]: Stable Diffusion v1.4 is trained on 512x512 images from a subset of the LAION-5B [41] dataset. This model uses a frozen CLIP ViT-L/14 text encoder to condition the model on text prompts. Its pre-trained weights can be obtained from <https://huggingface.co/CompVis/stable-diffusion-v1-4>.

**Latent Consistency Model** [28]: Latent consistency model is trained on 768x768 images from a subset of the LAION-5B [41] dataset, named LAION-Aesthetics. Its pre-trained weights can be obtained from [https://huggingface.co/SimianLuo/LCM\\_Dreamshaper\\_v7](https://huggingface.co/SimianLuo/LCM_Dreamshaper_v7).

**Pixart- $\alpha$**  [4]: Pixart- $\alpha$  is trained on images from SAM [19] dataset, whose text prompts are generated by LLaVA [23]. Its pre-trained weights can be obtained from <https://huggingface.co/PixArt-alpha/PixArt-XL-2-512x512>.

**Stable Cascade** [34]: Stable Cascade is built upon the Würstchen architecture [34], and trained on images from a subset of the LAION-5B [41] dataset.

Its pre-trained weights can be obtained from <https://huggingface.co/stabilityai/stable-cascade>.

### B.3. Parameter Setting Details

- **Experiments conducted on CIFAR10/CIFAR100:** We use the methods in [42] to generate 60,000 images as CIFAR10-Syn and CIFAR100-Syn for training the suspicious models. Specifically, we generate 20,000 images each using the techniques of “Class Prompt”, “Multi-Domain”, and “Random Unconditional Guidance”. Additionally, the shadow dataset and validation dataset retain default parameters except for the text prompts and resolution. Focal loss with  $\gamma = 2$  and  $\alpha = 0.25$ . All models are trained using the AdamW optimizer.
- **Experiments conducted on ImageNet-100:** We use the methods in [40] to generate 100,000 images as ImageNet-100-Syn for training the suspicious models. Specifically, we use “ $c, d_c$ ” to generate these images, where  $c$  is the class name, and  $d_c$  refers to the definition of class  $c$  provided by WordNet [30]. Guidance scale is 2. Additionally, the shadow dataset and validation dataset retain default parameters except for the text prompts and resolution. Focal loss with  $\gamma = 2$  and  $\alpha = 0.25$ . All models are trained using the AdamW optimizer.

### B.4. The Details of Han *et al.*’s Work

Unlike our setup, the work by Han *et al.* assumes that the defender has access to multiple different generative models to train an attributor. To enable comparison with this method, we followed this setup when using it. Specifically, we assume that the defender, in addition to having  $G_d$ , also possesses the other three text-to-image models mentioned in the paper (whereas in our setup, the defender has only one text-to-image model,  $G_d$ ). Using these generative models, we create four shadow datasets following the same approach, as well as one validation dataset generated using  $G_d$  in the same manner.

Based on each shadow dataset, we train 16 shadow models, all of which are ResNet18 with varied training hyperparameters. In total, we obtain 64 shadow models. Using these shadow models, we infer logits on the validation dataset to train an attributor. The attributor is a two-layer fully connected network with an input dimension matching the dimension of the logits and an output dimension of 2. It classifies logits of shadow models trained on synthetic data generated by  $G_d$  as 1 and others as 0. The attributor is trained for 10 epochs.

### B.5. The Details of Interference Resistance Experiments

**Multiple training data sources for  $M_{sus}$ .** In this experiment, the methods for generating the synthetic dataset and

| The Suspect's Data Sources            |                                 | TP | FP | FN | TN | Accuracy | F1 Score | AUROC |
|---------------------------------------|---------------------------------|----|----|----|----|----------|----------|-------|
| The Defender's Generative Model $G_d$ | Data Sources Unrelated to $G_d$ |    |    |    |    |          |          |       |
| Stable Diffusion [38] v1.4            | Latent Consistency Model        |    |    | 32 | 32 |          |          |       |
|                                       | PixArt- $\alpha$                | 32 | 32 | 32 | 32 | 0.500    | 0.286    | 0.500 |
|                                       | Stable Cascade                  |    |    | 32 | 32 |          |          |       |
|                                       | Real Data                       |    |    | 32 | 32 |          |          |       |
| Latent Consistency Model [28]         | Stable Diffusion v1.4           |    |    | 32 | 32 |          |          |       |
|                                       | PixArt- $\alpha$                | 32 | 32 | 32 | 32 | 0.500    | 0.286    | 0.500 |
|                                       | Stable Cascade                  |    |    | 32 | 32 |          |          |       |
|                                       | Real Data                       |    |    | 32 | 32 |          |          |       |
| PixArt- $\alpha$ [4]                  | Stable Diffusion v1.4           |    |    | 32 | 32 |          |          |       |
|                                       | Latent Consistency Model        | 32 | 32 | 32 | 32 | 0.500    | 0.286    | 0.500 |
|                                       | Stable Cascade                  |    |    | 32 | 32 |          |          |       |
|                                       | Real Data                       |    |    | 32 | 32 |          |          |       |
| Stable Cascade [34]                   | Stable Diffusion v1.4           |    |    | 32 | 32 |          |          |       |
|                                       | Latent Consistency Model        | 32 | 32 | 32 | 32 | 0.500    | 0.286    | 0.500 |
|                                       | PixArt- $\alpha$                |    |    | 32 | 32 |          |          |       |
|                                       | Real Data                       |    |    | 32 | 32 |          |          |       |
| Average Value                         |                                 |    |    |    |    | 0.500    | 0.286    | 0.500 |

Table A1. The results of random classification on CIFAR10.

training the network follow the settings in Sec. 4.1, with the only difference being that the training dataset for the suspicious model consists of both the synthetic and real datasets.

**Fine-tuning  $G_d$ .** In this experiment, we fine-tune  $G_d$  using LoRA with a batch size of 16, a learning rate of 1e-4 and a resolution of 512. The methods for generating dataset and training network follow the settings in Sec. 4.1.

**Fine-tuning  $M_{sus}$ .** In this experiment, we fine-tune the suspicious model with a learning rate of 1e-5, a weight decay of 1e-4, a batch size of 64, and the cross-entropy loss function. The methods for generating the synthetic dataset and training the network follow the settings in Sec. 4.1.

## B.6. Hypothesis Testing

We represent the generalization errors of  $M_{sdw}$  and  $M_{sus}$  by the sets of accuracies  $\mathcal{A}_{sdw}$  and  $\mathcal{A}_{sus}$  for each batch on the validation dataset. Then we use the Grubbs test to determine whether the mean of  $\mathcal{A}_{sus}$  is a low-value outlier of  $\mathcal{A}_{sdw}$ . The pseudocode is shown in Algorithm 1, where  $t_{1-\frac{\alpha}{n}, n-2}$  is the critical value of the t-distribution with degrees of freedom  $n - 2$  and significance level  $\alpha$ . When  $G > G_0$ , we consider  $mean(\mathcal{A}_{sus})$  to be a low-value outlier of  $\mathcal{A}_{sdw}$ , meaning the generalization error gap between two models is significant, and  $M_{sus}$  is deemed legitimate. When  $G \leq G_0$ ,  $mean(\mathcal{A}_{sus})$  falls within the distribution of  $\mathcal{A}_{sdw}$ , indicating that the generalization errors of two models are close, and  $M_{sus}$  is deemed illegal.

## C. Results on CLIP

We fine-tuned CLIP [35] on ImageNet-100 using hyperparameters in Sec. 4.1, with ResNet50 and ViT-B. Then We calculate accuracies of TrainProVe and Han *et al.*'s work on

### Algorithm 1 Grubbs' Hypothesis Test

- 1: **Input:**  $\mathcal{A}_{sdw}, \mathcal{A}_{sus}$ , significance level  $\alpha = 0.05$
- 2:  $m_{sdw} = mean(\mathcal{A}_{sdw}), s_{sdw} = std(\mathcal{A}_{sdw})$
- 3:  $n = len(\mathcal{A}_{sdw}), m_{sus} = mean(\mathcal{A}_{sus})$
- 4:  $G = \frac{m_{sdw} - m_{sus}}{s_{sdw}}, G_0 = \frac{(n-1)}{\sqrt{n}} \sqrt{\frac{(t_{1-\frac{\alpha}{n}, n-2})^2}{n-2 + (t_{1-\frac{\alpha}{n}, n-2})^2}}$
- 5: **Output:**  $G > G_0$

Stable Diffusion v1.4. Finally, the accuracy of TrainProVe reached 0.75, while Han *et al.*'s work only achieved 0.56, meaning that compared to the baseline, TrainProVe can still be applied to more complex scenarios.

## D. More Experimental Results

Here, we present the specific results of different methods on various datasets (as shown in Tab. 1 of the paper), as shown in Tab. A1 - Tab. A14.

| The Suspect's Data Sources            |                                 | TP | FP | FN | TN | Accuracy | F1 Score | AUROC |
|---------------------------------------|---------------------------------|----|----|----|----|----------|----------|-------|
| The Defender's Generative Model $G_d$ | Data Sources Unrelated to $G_d$ |    |    |    |    |          |          |       |
| Stable Diffusion [38] v1.4            | Latent Consistency Model        |    |    | 0  | 64 |          |          |       |
|                                       | PixArt- $\alpha$                | 60 | 4  | 0  | 64 | 0.756    | 0.606    | 0.824 |
|                                       | Stable Cascade                  |    |    | 14 | 50 |          |          |       |
|                                       | Real Data                       |    |    | 60 | 4  |          |          |       |
| Latent Consistency Model [28]         | Stable Diffusion v1.4           |    |    | 4  | 60 |          |          |       |
|                                       | PixArt- $\alpha$                | 64 | 0  | 0  | 64 | 0.969    | 0.928    | 0.980 |
|                                       | Stable Cascade                  |    |    | 2  | 62 |          |          |       |
|                                       | Real Data                       |    |    | 4  | 60 |          |          |       |
| PixArt- $\alpha$ [4]                  | Stable Diffusion v1.4           |    |    | 0  | 64 |          |          |       |
|                                       | Latent Consistency Model        | 47 | 17 | 0  | 64 | 0.919    | 0.783    | 0.850 |
|                                       | Stable Cascade                  |    |    | 9  | 55 |          |          |       |
|                                       | Real Data                       |    |    | 0  | 64 |          |          |       |
| Stable Cascade [34]                   | Stable Diffusion v1.4           |    |    | 60 | 4  |          |          |       |
|                                       | Latent Consistency Model        | 0  | 64 | 53 | 11 | 0.428    | 0.000    | 0.268 |
|                                       | PixArt- $\alpha$                |    |    | 0  | 64 |          |          |       |
|                                       | Real Data                       |    |    | 6  | 58 |          |          |       |
| Average Value                         |                                 |    |    |    |    | 0.768    | 0.579    | 0.731 |

Table A2. The results of Han *et al.*'s method on CIFAR10.

| The Suspect's Data Sources            |                                 | TP | FP | FN | TN | Accuracy | F1 Score | AUROC |
|---------------------------------------|---------------------------------|----|----|----|----|----------|----------|-------|
| The Defender's Generative Model $G_d$ | Data Sources Unrelated to $G_d$ |    |    |    |    |          |          |       |
| Stable Diffusion [38] v1.4            | Latent Consistency Model        |    |    | 4  | 60 |          |          |       |
|                                       | PixArt- $\alpha$                | 64 | 0  | 4  | 60 | 0.941    | 0.871    | 0.963 |
|                                       | Stable Cascade                  |    |    | 7  | 57 |          |          |       |
|                                       | Real Data                       |    |    | 4  | 60 |          |          |       |
| Latent Consistency Model [28]         | Stable Diffusion v1.4           |    |    | 0  | 64 |          |          |       |
|                                       | PixArt- $\alpha$                | 22 | 42 | 0  | 64 | 0.869    | 0.512    | 0.672 |
|                                       | Stable Cascade                  |    |    | 0  | 64 |          |          |       |
|                                       | Real Data                       |    |    | 0  | 64 |          |          |       |
| PixArt- $\alpha$ [4]                  | Stable Diffusion v1.4           |    |    | 25 | 39 |          |          |       |
|                                       | Latent Consistency Model        | 64 | 0  | 32 | 32 | 0.609    | 0.506    | 0.756 |
|                                       | Stable Cascade                  |    |    | 64 | 0  |          |          |       |
|                                       | Real Data                       |    |    | 4  | 60 |          |          |       |
| Stable Cascade [34]                   | Stable Diffusion v1.4           |    |    | 17 | 47 |          |          |       |
|                                       | Latent Consistency Model        | 64 | 0  | 5  | 59 | 0.828    | 0.699    | 0.893 |
|                                       | PixArt- $\alpha$                |    |    | 19 | 45 |          |          |       |
|                                       | Real Data                       |    |    | 14 | 50 |          |          |       |
| Average Value                         |                                 |    |    |    |    | 0.812    | 0.647    | 0.821 |

Table A3. The results of TrainProVe-Sim on CIFAR10.

| The Suspect's Data Sources            |                                 | TP | FP | FN | TN | Accuracy | F1 Score | AUROC |
|---------------------------------------|---------------------------------|----|----|----|----|----------|----------|-------|
| The Defender's Generative Model $G_d$ | Data Sources Unrelated to $G_d$ |    |    |    |    |          |          |       |
| Stable Diffusion [38] v1.4            | Latent Consistency Model        |    |    | 1  | 63 |          |          |       |
|                                       | PixArt- $\alpha$                | 57 | 7  | 0  | 64 | 0.928    | 0.832    | 0.914 |
|                                       | Stable Cascade                  |    |    | 11 | 53 |          |          |       |
|                                       | Real Data                       |    |    | 4  | 60 |          |          |       |
| Latent Consistency Model [28]         | Stable Diffusion v1.4           |    |    | 0  | 64 |          |          |       |
|                                       | PixArt- $\alpha$                | 60 | 4  | 0  | 64 | 0.988    | 0.968    | 0.969 |
|                                       | Stable Cascade                  |    |    | 0  | 64 |          |          |       |
|                                       | Real Data                       |    |    | 0  | 64 |          |          |       |
| PixArt- $\alpha$ [4]                  | Stable Diffusion v1.4           |    |    | 9  | 55 |          |          |       |
|                                       | Latent Consistency Model        | 64 | 0  | 22 | 42 | 0.725    | 0.593    | 0.828 |
|                                       | Stable Cascade                  |    |    | 54 | 10 |          |          |       |
|                                       | Real Data                       |    |    | 3  | 61 |          |          |       |
| Stable Cascade [34]                   | Stable Diffusion v1.4           |    |    | 9  | 55 |          |          |       |
|                                       | Latent Consistency Model        | 64 | 0  | 16 | 48 | 0.831    | 0.703    | 0.895 |
|                                       | PixArt- $\alpha$                |    |    | 23 | 41 |          |          |       |
|                                       | Real Data                       |    |    | 6  | 58 |          |          |       |
| Average Value                         |                                 |    |    |    |    | 0.868    | 0.774    | 0.902 |

Table A4. The results of TrainProVe-Ent on CIFAR10.

| The Suspect's Data Sources            |                                 | TP | FP | FN | TN | Accuracy | F1 Score | AUROC |
|---------------------------------------|---------------------------------|----|----|----|----|----------|----------|-------|
| The Defender's Generative Model $G_d$ | Data Sources Unrelated to $G_d$ |    |    |    |    |          |          |       |
| Stable Diffusion [38] v1.4            | Latent Consistency Model        |    |    | 32 | 32 |          |          |       |
|                                       | PixArt- $\alpha$                | 32 | 32 | 32 | 32 | 0.500    | 0.286    | 0.500 |
|                                       | Stable Cascade                  |    |    | 32 | 32 |          |          |       |
|                                       | Real Data                       |    |    | 32 | 32 |          |          |       |
| Latent Consistency Model [28]         | Stable Diffusion v1.4           |    |    | 32 | 32 |          |          |       |
|                                       | PixArt- $\alpha$                | 32 | 32 | 32 | 32 | 0.500    | 0.286    | 0.500 |
|                                       | Stable Cascade                  |    |    | 32 | 32 |          |          |       |
|                                       | Real Data                       |    |    | 32 | 32 |          |          |       |
| PixArt- $\alpha$ [4]                  | Stable Diffusion v1.4           |    |    | 32 | 32 |          |          |       |
|                                       | Latent Consistency Model        | 32 | 32 | 32 | 32 | 0.500    | 0.286    | 0.500 |
|                                       | Stable Cascade                  |    |    | 32 | 32 |          |          |       |
|                                       | Real Data                       |    |    | 32 | 32 |          |          |       |
| Stable Cascade [34]                   | Stable Diffusion v1.4           |    |    | 32 | 32 |          |          |       |
|                                       | Latent Consistency Model        | 32 | 32 | 32 | 32 | 0.500    | 0.286    | 0.500 |
|                                       | PixArt- $\alpha$                |    |    | 32 | 32 |          |          |       |
|                                       | Real Data                       |    |    | 32 | 32 |          |          |       |
| Average Value                         |                                 |    |    |    |    | 0.500    | 0.286    | 0.500 |

Table A5. The results of random classification on CIFAR100.

| The Suspect's Data Sources            |                                 | TP | FP | FN | TN | Accuracy | F1 Score | AUROC |
|---------------------------------------|---------------------------------|----|----|----|----|----------|----------|-------|
| The Defender's Generative Model $G_d$ | Data Sources Unrelated to $G_d$ |    |    |    |    |          |          |       |
| Stable Diffusion [38] v1.4            | Latent Consistency Model        |    |    | 0  | 64 |          |          |       |
|                                       | PixArt- $\alpha$                | 64 | 0  | 9  | 55 | 0.772    | 0.637    | 0.861 |
|                                       | Stable Cascade                  |    |    | 32 | 32 |          |          |       |
|                                       | Real Data                       |    |    | 32 | 32 |          |          |       |
| Latent Consistency Model [28]         | Stable Diffusion v1.4           |    |    | 0  | 64 |          |          |       |
|                                       | PixArt- $\alpha$                | 64 | 0  | 0  | 64 | 1.000    | 1.000    | 1.000 |
|                                       | Stable Cascade                  |    |    | 0  | 64 |          |          |       |
|                                       | Real Data                       |    |    | 0  | 64 |          |          |       |
| PixArt- $\alpha$ [4]                  | Stable Diffusion v1.4           |    |    | 0  | 64 |          |          |       |
|                                       | Latent Consistency Model        | 36 | 28 | 0  | 64 | 0.791    | 0.518    | 0.705 |
|                                       | Stable Cascade                  |    |    | 32 | 32 |          |          |       |
|                                       | Real Data                       |    |    | 7  | 57 |          |          |       |
| Stable Cascade [34]                   | Stable Diffusion v1.4           |    |    | 28 | 36 |          |          |       |
|                                       | Latent Consistency Model        | 4  | 60 | 64 | 0  | 0.356    | 0.037    | 0.246 |
|                                       | PixArt- $\alpha$                |    |    | 47 | 17 |          |          |       |
|                                       | Real Data                       |    |    | 7  | 57 |          |          |       |
| Average Value                         |                                 |    |    |    |    | 0.730    | 0.548    | 0.703 |

Table A6. The results of Han *et al.*'s Method on CIFAR100.

| The Suspect's Data Sources            |                                 | TP | FP | FN | TN | Accuracy | F1 Score | AUROC |
|---------------------------------------|---------------------------------|----|----|----|----|----------|----------|-------|
| The Defender's Generative Model $G_d$ | Data Sources Unrelated to $G_d$ |    |    |    |    |          |          |       |
| Stable Diffusion [38] v1.4            | Latent Consistency Model        |    |    | 32 | 32 |          |          |       |
|                                       | PixArt- $\alpha$                | 28 | 36 | 29 | 35 | 0.509    | 0.263    | 0.498 |
|                                       | Stable Cascade                  |    |    | 32 | 32 |          |          |       |
|                                       | Real Data                       |    |    | 28 | 36 |          |          |       |
| Latent Consistency Model [28]         | Stable Diffusion v1.4           |    |    | 12 | 52 |          |          |       |
|                                       | PixArt- $\alpha$                | 32 | 32 | 12 | 52 | 0.672    | 0.379    | 0.607 |
|                                       | Stable Cascade                  |    |    | 22 | 42 |          |          |       |
|                                       | Real Data                       |    |    | 10 | 54 |          |          |       |
| PixArt- $\alpha$ [4]                  | Stable Diffusion v1.4           |    |    | 32 | 32 |          |          |       |
|                                       | Latent Consistency Model        | 32 | 32 | 32 | 32 | 0.500    | 0.286    | 0.500 |
|                                       | Stable Cascade                  |    |    | 32 | 32 |          |          |       |
|                                       | Real Data                       |    |    | 32 | 32 |          |          |       |
| Stable Cascade [34]                   | Stable Diffusion v1.4           |    |    | 16 | 48 |          |          |       |
|                                       | Latent Consistency Model        | 32 | 32 | 32 | 32 | 0.619    | 0.344    | 0.574 |
|                                       | PixArt- $\alpha$                |    |    | 26 | 38 |          |          |       |
|                                       | Real Data                       |    |    | 16 | 48 |          |          |       |
| Average Value                         |                                 |    |    |    |    | 0.575    | 0.318    | 0.545 |

Table A7. The results of TrainProVe-Sim on CIFAR100.

| The Suspect's Data Sources            |                                 | TP | FP | FN | TN | Accuracy | F1 Score | AUROC |
|---------------------------------------|---------------------------------|----|----|----|----|----------|----------|-------|
| The Defender's Generative Model $G_d$ | Data Sources Unrelated to $G_d$ |    |    |    |    |          |          |       |
| Stable Diffusion [38] v1.4            | Latent Consistency Model        |    |    | 64 | 0  |          |          |       |
|                                       | PixArt- $\alpha$                | 64 | 0  | 55 | 9  | 0.347    | 0.380    | 0.592 |
|                                       | Stable Cascade                  |    |    | 58 | 6  |          |          |       |
|                                       | Real Data                       |    |    | 32 | 32 |          |          |       |
| Latent Consistency Model [28]         | Stable Diffusion v1.4           |    |    | 25 | 39 |          |          |       |
|                                       | PixArt- $\alpha$                | 64 | 0  | 32 | 32 | 0.628    | 0.518    | 0.768 |
|                                       | Stable Cascade                  |    |    | 48 | 16 |          |          |       |
|                                       | Real Data                       |    |    | 14 | 50 |          |          |       |
| PixArt- $\alpha$ [4]                  | Stable Diffusion v1.4           |    |    | 60 | 4  |          |          |       |
|                                       | Latent Consistency Model        | 64 | 0  | 64 | 0  | 0.253    | 0.349    | 0.533 |
|                                       | Stable Cascade                  |    |    | 64 | 0  |          |          |       |
|                                       | Real Data                       |    |    | 51 | 13 |          |          |       |
| Stable Cascade [34]                   | Stable Diffusion v1.4           |    |    | 41 | 23 |          |          |       |
|                                       | Latent Consistency Model        | 64 | 0  | 62 | 2  | 0.363    | 0.386    | 0.602 |
|                                       | PixArt- $\alpha$                |    |    | 64 | 0  |          |          |       |
|                                       | Real Data                       |    |    | 37 | 27 |          |          |       |
| Average Value                         |                                 |    |    |    |    | 0.398    | 0.408    | 0.624 |

Table A8. The results of TrainProVe-Ent on CIFAR100.

| The Suspect's Data Sources            |                                 | TP | FP | FN | TN | Accuracy | F1 Score | AUROC |
|---------------------------------------|---------------------------------|----|----|----|----|----------|----------|-------|
| The Defender's Generative Model $G_d$ | Data Sources Unrelated to $G_d$ |    |    |    |    |          |          |       |
| Stable Diffusion [38] v1.4            | Latent Consistency Model        |    |    | 0  | 64 |          |          |       |
|                                       | PixArt- $\alpha$                | 64 | 0  | 0  | 64 | 0.988    | 0.970    | 1.000 |
|                                       | Stable Cascade                  |    |    | 0  | 64 |          |          |       |
|                                       | Real Data                       |    |    | 0  | 64 |          |          |       |
| Latent Consistency Model [28]         | Stable Diffusion v1.4           |    |    | 0  | 64 |          |          |       |
|                                       | PixArt- $\alpha$                | 64 | 0  | 0  | 64 | 1.000    | 1.000    | 1.000 |
|                                       | Stable Cascade                  |    |    | 0  | 64 |          |          |       |
|                                       | Real Data                       |    |    | 0  | 64 |          |          |       |
| PixArt- $\alpha$ [4]                  | Stable Diffusion v1.4           |    |    | 0  | 64 |          |          |       |
|                                       | Latent Consistency Model        | 55 | 9  | 0  | 64 | 0.972    | 0.924    | 0.930 |
|                                       | Stable Cascade                  |    |    | 0  | 64 |          |          |       |
|                                       | Real Data                       |    |    | 0  | 64 |          |          |       |
| Stable Cascade [34]                   | Stable Diffusion v1.4           |    |    | 0  | 64 |          |          |       |
|                                       | Latent Consistency Model        | 63 | 1  | 0  | 64 | 0.997    | 0.992    | 0.992 |
|                                       | PixArt- $\alpha$                |    |    | 0  | 64 |          |          |       |
|                                       | Real Data                       |    |    | 0  | 64 |          |          |       |
| Average Value                         |                                 |    |    |    |    | 0.992    | 0.979    | 0.981 |

Table A9. The results of TrainProVe on CIFAR100.

| The Suspect's Data Sources            |                                 | TP | FP | FN | TN | Accuracy | F1 Score | AUROC |
|---------------------------------------|---------------------------------|----|----|----|----|----------|----------|-------|
| The Defender's Generative Model $G_d$ | Data Sources Unrelated to $G_d$ |    |    |    |    |          |          |       |
| Stable Diffusion [38] v1.4            | Latent Consistency Model        |    |    | 32 | 32 |          |          |       |
|                                       | PixArt- $\alpha$                | 32 | 32 | 32 | 32 | 0.500    | 0.286    | 0.500 |
|                                       | Stable Cascade                  |    |    | 32 | 32 |          |          |       |
|                                       | Real Data                       |    |    | 32 | 32 |          |          |       |
| Latent Consistency Model [28]         | Stable Diffusion v1.4           |    |    | 32 | 32 |          |          |       |
|                                       | PixArt- $\alpha$                | 32 | 32 | 32 | 32 | 0.500    | 0.286    | 0.500 |
|                                       | Stable Cascade                  |    |    | 32 | 32 |          |          |       |
|                                       | Real Data                       |    |    | 32 | 32 |          |          |       |
| PixArt- $\alpha$ [4]                  | Stable Diffusion v1.4           |    |    | 32 | 32 |          |          |       |
|                                       | Latent Consistency Model        | 32 | 32 | 32 | 32 | 0.500    | 0.286    | 0.500 |
|                                       | Stable Cascade                  |    |    | 32 | 32 |          |          |       |
|                                       | Real Data                       |    |    | 32 | 32 |          |          |       |
| Stable Cascade [34]                   | Stable Diffusion v1.4           |    |    | 32 | 32 |          |          |       |
|                                       | Latent Consistency Model        | 32 | 32 | 32 | 32 | 0.500    | 0.286    | 0.500 |
|                                       | PixArt- $\alpha$                |    |    | 32 | 32 |          |          |       |
|                                       | Real Data                       |    |    | 32 | 32 |          |          |       |
| Average Value                         |                                 |    |    |    |    | 0.500    | 0.286    | 0.500 |

Table A10. The results of random classification on ImageNet-100.



| The Suspect's Data Sources            |                                 | TP | FP | FN | TN | Accuracy | F1 Score | AUROC |
|---------------------------------------|---------------------------------|----|----|----|----|----------|----------|-------|
| The Defender's Generative Model $G_d$ | Data Sources Unrelated to $G_d$ |    |    |    |    |          |          |       |
| Stable Diffusion [38] v1.4            | Latent Consistency Model        |    |    | 31 | 33 |          |          |       |
|                                       | PixArt- $\alpha$                | 32 | 32 | 0  | 64 | 0.684    | 0.388    | 0.615 |
|                                       | Stable Cascade                  |    |    | 6  | 58 |          |          |       |
|                                       | Real Data                       |    |    | 32 | 32 |          |          |       |
| Latent Consistency Model [28]         | Stable Diffusion v1.4           |    |    | 15 | 49 |          |          |       |
|                                       | PixArt- $\alpha$                | 26 | 38 | 6  | 58 | 0.772    | 0.416    | 0.635 |
|                                       | Stable Cascade                  |    |    | 1  | 63 |          |          |       |
|                                       | Real Data                       |    |    | 13 | 51 |          |          |       |
| PixArt- $\alpha$ [4]                  | Stable Diffusion v1.4           |    |    | 24 | 40 |          |          |       |
|                                       | Latent Consistency Model        | 64 | 0  | 3  | 61 | 0.753    | 0.618    | 0.846 |
|                                       | Stable Cascade                  |    |    | 32 | 32 |          |          |       |
|                                       | Real Data                       |    |    | 20 | 44 |          |          |       |
| Stable Cascade [34]                   | Stable Diffusion v1.4           |    |    | 32 | 32 |          |          |       |
|                                       | Latent Consistency Model        | 32 | 32 | 40 | 24 | 0.475    | 0.276    | 0.484 |
|                                       | PixArt- $\alpha$                |    |    | 32 | 32 |          |          |       |
|                                       | Real Data                       |    |    | 32 | 32 |          |          |       |
| Average Value                         |                                 |    |    |    |    | 0.671    | 0.425    | 0.645 |

Table A11. The results of Han *et al.*'s Method on ImageNet-100.

| The Suspect's Data Sources            |                                 | TP | FP | FN | TN | Accuracy | F1 Score | AUROC |
|---------------------------------------|---------------------------------|----|----|----|----|----------|----------|-------|
| The Defender's Generative Model $G_d$ | Data Sources Unrelated to $G_d$ |    |    |    |    |          |          |       |
| Stable Diffusion [38] v1.4            | Latent Consistency Model        |    |    | 32 | 32 |          |          |       |
|                                       | PixArt- $\alpha$                | 32 | 32 | 30 | 34 | 0.506    | 0.288    | 0.504 |
|                                       | Stable Cascade                  |    |    | 32 | 32 |          |          |       |
|                                       | Real Data                       |    |    | 32 | 32 |          |          |       |
| Latent Consistency Model [28]         | Stable Diffusion v1.4           |    |    | 16 | 48 |          |          |       |
|                                       | PixArt- $\alpha$                | 28 | 36 | 16 | 48 | 0.641    | 0.327    | 0.564 |
|                                       | Stable Cascade                  |    |    | 26 | 38 |          |          |       |
|                                       | Real Data                       |    |    | 21 | 43 |          |          |       |
| PixArt- $\alpha$ [4]                  | Stable Diffusion v1.4           |    |    | 28 | 36 |          |          |       |
|                                       | Latent Consistency Model        | 32 | 32 | 32 | 32 | 0.519    | 0.294    | 0.512 |
|                                       | Stable Cascade                  |    |    | 32 | 32 |          |          |       |
|                                       | Real Data                       |    |    | 30 | 34 |          |          |       |
| Stable Cascade [34]                   | Stable Diffusion v1.4           |    |    | 26 | 38 |          |          |       |
|                                       | Latent Consistency Model        | 32 | 32 | 31 | 33 | 0.553    | 0.309    | 0.533 |
|                                       | PixArt- $\alpha$                |    |    | 28 | 36 |          |          |       |
|                                       | Real Data                       |    |    | 26 | 38 |          |          |       |
| Average Value                         |                                 |    |    |    |    | 0.555    | 0.305    | 0.528 |

Table A12. The results of TrainProVe-Sim on ImageNet-100.

| The Suspect's Data Sources            |                                 | TP | FP | FN | TN | Accuracy | F1 Score | AUROC |
|---------------------------------------|---------------------------------|----|----|----|----|----------|----------|-------|
| The Defender's Generative Model $G_d$ | Data Sources Unrelated to $G_d$ |    |    |    |    |          |          |       |
| Stable Diffusion [38] v1.4            | Latent Consistency Model        |    |    | 53 | 11 |          |          |       |
|                                       | PixArt- $\alpha$                | 64 | 0  | 60 | 4  | 0.266    | 0.353    | 0.541 |
|                                       | Stable Cascade                  |    |    | 62 | 2  |          |          |       |
|                                       | Real Data                       |    |    | 60 | 4  |          |          |       |
| Latent Consistency Model [28]         | Stable Diffusion v1.4           |    |    | 41 | 23 |          |          |       |
|                                       | PixArt- $\alpha$                | 51 | 13 | 48 | 16 | 0.441    | 0.363    | 0.574 |
|                                       | Stable Cascade                  |    |    | 37 | 27 |          |          |       |
|                                       | Real Data                       |    |    | 40 | 24 |          |          |       |
| PixArt- $\alpha$ [4]                  | Stable Diffusion v1.4           |    |    | 56 | 8  |          |          |       |
|                                       | Latent Consistency Model        | 60 | 4  | 41 | 23 | 0.338    | 0.361    | 0.563 |
|                                       | Stable Cascade                  |    |    | 59 | 5  |          |          |       |
|                                       | Real Data                       |    |    | 52 | 12 |          |          |       |
| Stable Cascade [34]                   | Stable Diffusion v1.4           |    |    | 53 | 11 |          |          |       |
|                                       | Latent Consistency Model        | 60 | 4  | 36 | 28 | 0.381    | 0.377    | 0.590 |
|                                       | PixArt- $\alpha$                |    |    | 53 | 11 |          |          |       |
|                                       | Real Data                       |    |    | 52 | 12 |          |          |       |
| Average Value                         |                                 |    |    |    |    | 0.356    | 0.364    | 0.567 |

Table A13. The results of TrainProVe-Ent on ImageNet-100.

| The Suspect's Data Sources            |                                 | TP | FP | FN | TN | Accuracy | F1 Score | AUROC |
|---------------------------------------|---------------------------------|----|----|----|----|----------|----------|-------|
| The Defender's Generative Model $G_d$ | Data Sources Unrelated to $G_d$ |    |    |    |    |          |          |       |
| Stable Diffusion [38] v1.4            | Latent Consistency Model        |    |    | 0  | 64 |          |          |       |
|                                       | PixArt- $\alpha$                | 64 | 0  | 0  | 64 | 0.819    | 0.688    | 0.887 |
|                                       | Stable Cascade                  |    |    | 11 | 53 |          |          |       |
|                                       | Real Data                       |    |    | 47 | 17 |          |          |       |
| Latent Consistency Model [28]         | Stable Diffusion v1.4           |    |    | 0  | 64 |          |          |       |
|                                       | PixArt- $\alpha$                | 2  | 62 | 0  | 64 | 0.806    | 0.061    | 0.517 |
|                                       | Stable Cascade                  |    |    | 0  | 64 |          |          |       |
|                                       | Real Data                       |    |    | 0  | 64 |          |          |       |
| PixArt- $\alpha$ [4]                  | Stable Diffusion v1.4           |    |    | 29 | 35 |          |          |       |
|                                       | Latent Consistency Model        | 64 | 0  | 0  | 64 | 0.734    | 0.601    | 0.834 |
|                                       | Stable Cascade                  |    |    | 24 | 40 |          |          |       |
|                                       | Real Data                       |    |    | 32 | 32 |          |          |       |
| Stable Cascade [34]                   | Stable Diffusion v1.4           |    |    | 32 | 32 |          |          |       |
|                                       | Latent Consistency Model        | 59 | 5  | 0  | 64 | 0.784    | 0.631    | 0.836 |
|                                       | PixArt- $\alpha$                |    |    | 0  | 64 |          |          |       |
|                                       | Real Data                       |    |    | 32 | 32 |          |          |       |
| Average Value                         |                                 |    |    |    |    | 0.786    | 0.495    | 0.769 |

Table A14. The results of TrainProVe on ImageNet-100.
